# Supplementary material
Source: PubMed Central journal article supplement (PMC7656718)

# 中国典型培养物保藏中心

CHINA CENTER FOR TYPE CULTURE COLLECTION (CCTCC)

Wuhan University, Wuhan 430072, China

Phone: 86-027-68752093

Fax: 86-027-68754833

Email: shenchao@whu.edu.cn

05-24-2018

Entrusted by Zhejiang University, CCTCC has conducted identification experiments on the MenSC cell line, and come to the following conclusions:

1. There was no third allele found in all the locations of MenSC cell line, it indicating that there was no cross-contaminant of human source cell line.
2. Compared the STR data of MenSC cell line in the databases of ATCC and DSMZ, its profile does not exactly match with any of the current data (Table 1).
3. The STR data of MenSC cell line and NCI-H64 (CRL-5976) cell line matches the highest rate of 75% in ATCC databases.

Manager:

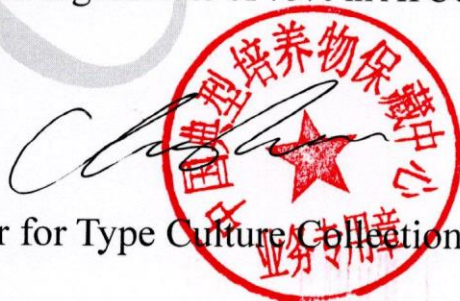

China Center for Type Culture Collection

Note:

1. The result is only responsible for the test sample, and the genomic DNA will be reserved for three month.
2. Reference of human cell line authentication: ANSI/ATCC ASN-0002-2011

Table 1. The alleles of 21 locations in MenSC cell line

| MenSC cell line (Fig. No.XB7641) |    |      |
|----------------------------------|----|------|
| D19S433                          | 13 | 14.2 |
| D5S818                           | 11 | 11   |
| D21S11                           | 29 | 30   |
| D18S51                           | 13 | 17   |
| D6S1043                          | 12 | 13   |
| AMEL                             | X  | X    |
| D3S1358                          | 15 | 16   |
| D13S317                          | 10 | 10   |
| D7S820                           | 8  | 10   |
| D16S539                          | 10 | 12   |
| CSF1PO                           | 9  | 10   |
| Penta D                          | 9  | 12   |
| D2S441                           | 10 | 12   |
| vWA                              | 17 | 18   |
| D8S1179                          | 14 | 14   |
| TPOX                             | 8  | 11   |
| Penta E                          | 18 | 19   |
| TH01                             | 9  | 9    |
| D12S391                          | 20 | 21   |
| D2S1338                          | 18 | 24   |
| FGA                              | 21 | 21   |
| FGA                              | 22 | 22   |

| Sample Name | Panel | SQ0 | SQ |
|-------------|-------|-----|----|
|-------------|-------|-----|----|

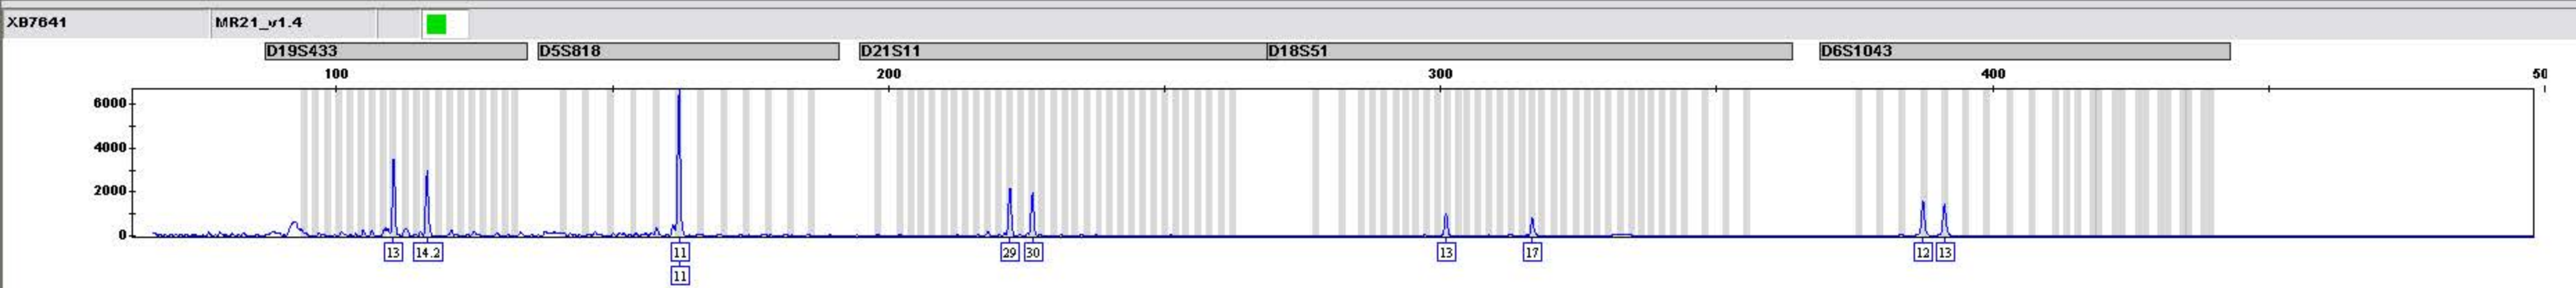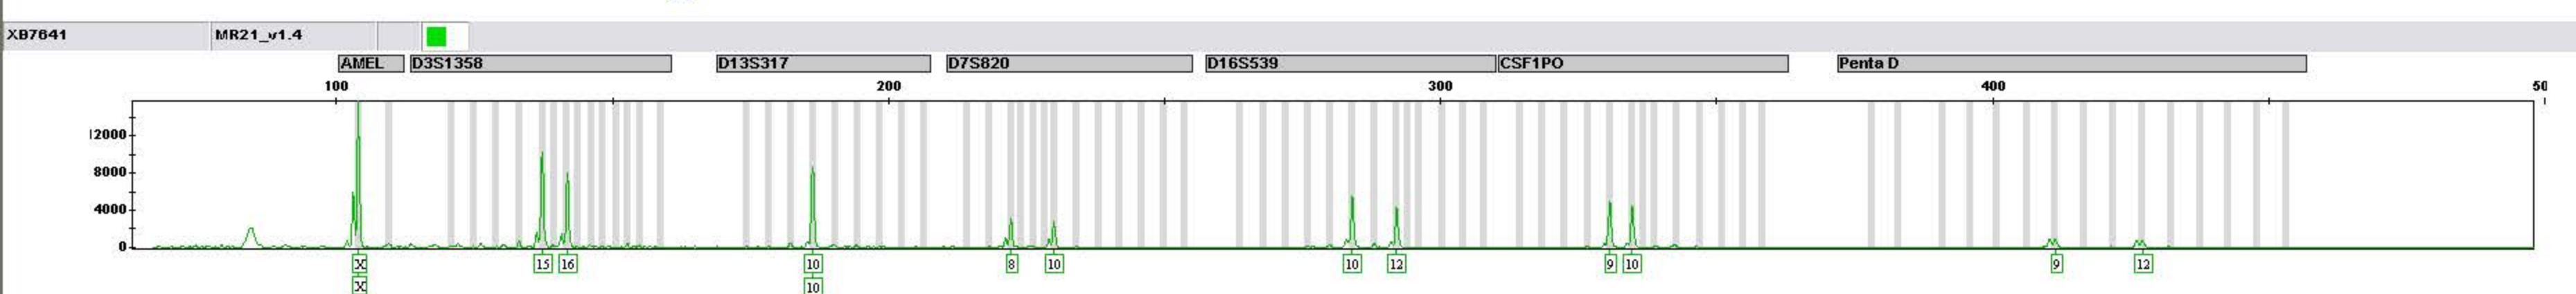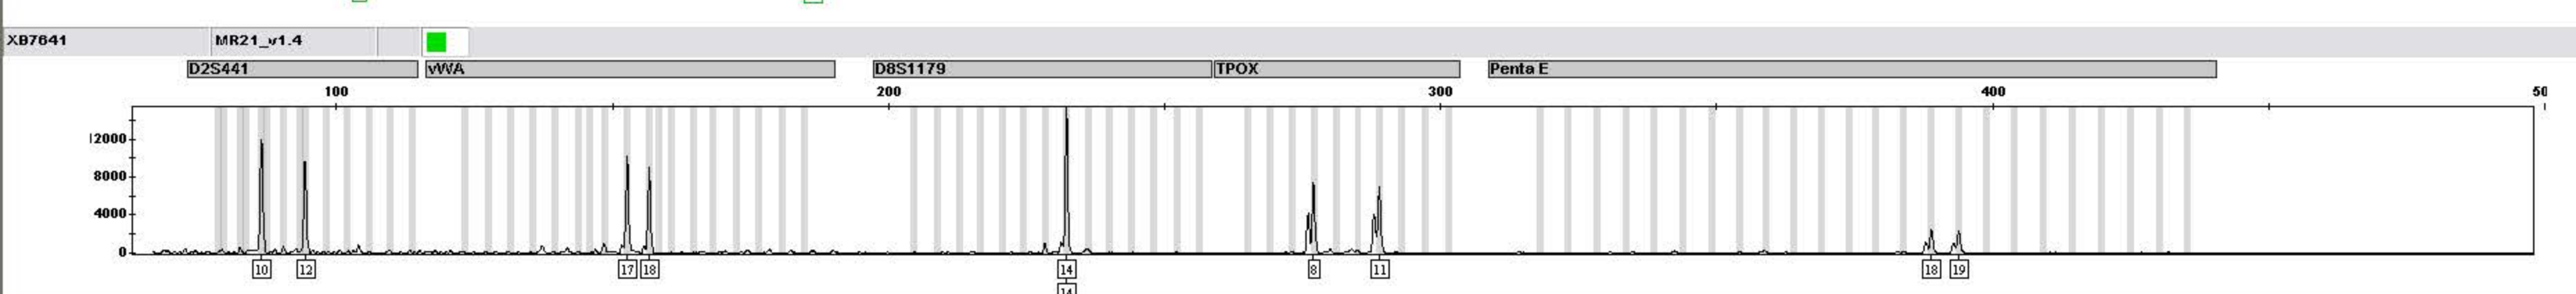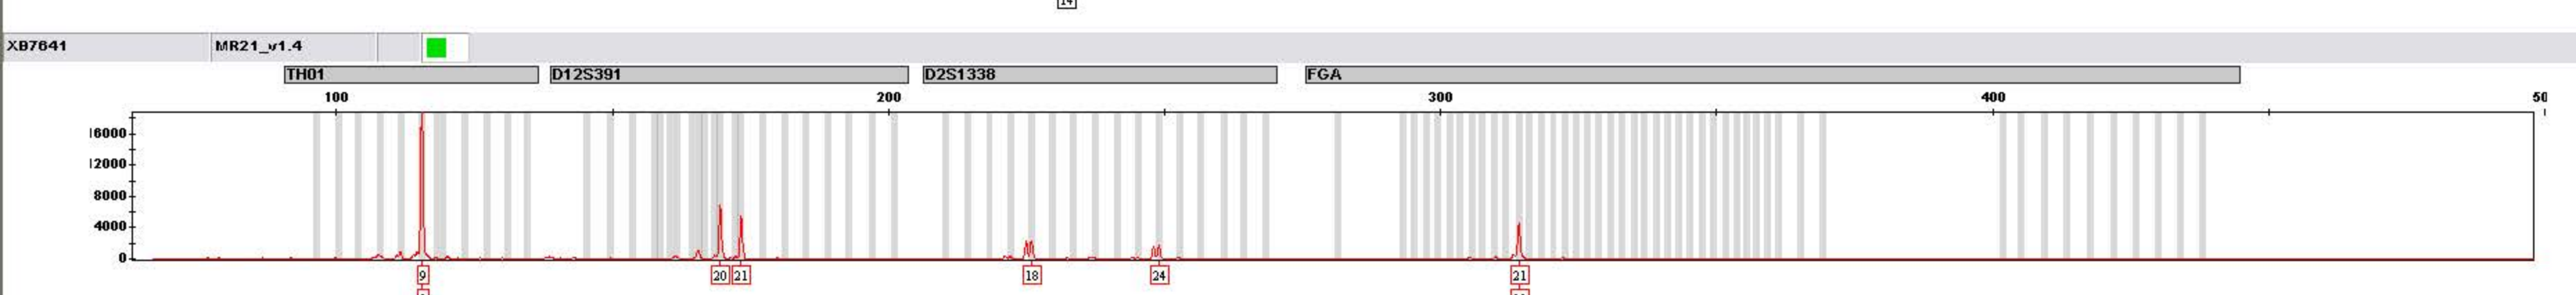

Supplement: 13287_2020_1926_MOESM7_ESM.pdf [file 13287_2020_1926_MOESM7_ESM.pdf]
