# Supplementary material
Source: PubMed Central journal article supplement (PMC7656718)
Supplement: 13287_2020_1926_MOESM1_ESM.pdf [file 13287_2020_1926_MOESM1_ESM.pdf]

Additional file 1

Supplemental Figure 1

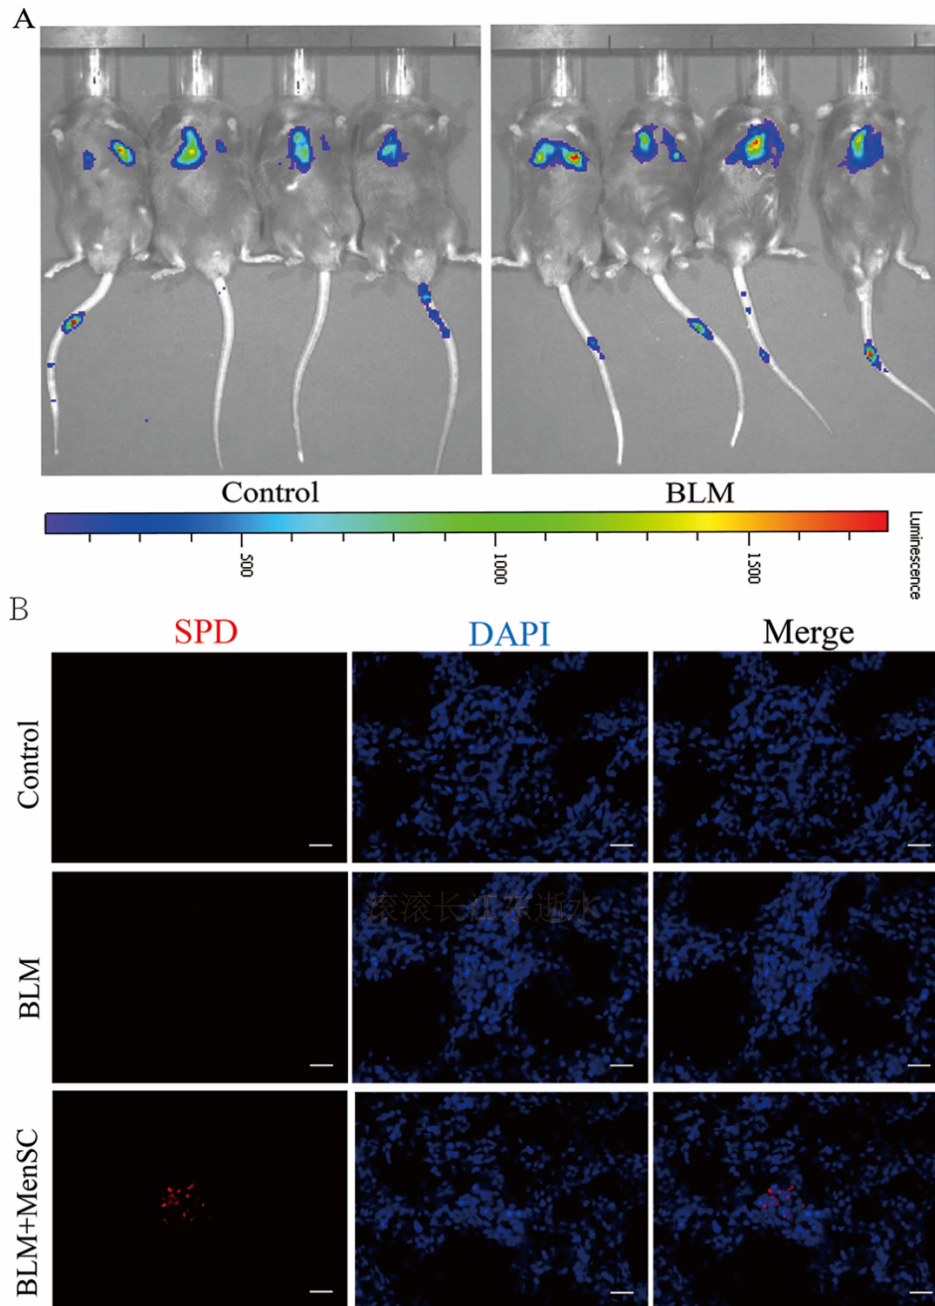

**Figure S1. Migration of MenSCs and differentiation of MenSCs in vivo. A**

Migration of MenSCs in the lung of mice observed by a living imaging system (n=4).

**B** surface protein D expression examined in the fibrotic lungs of mice (n=4). Scale

bar: 20 $\mu$ m.
