# Supplementary material
Source: PubMed Central journal article supplement (PMC7656718)
Supplement: 13287_2020_1926_MOESM2_ESM.pdf [file 13287_2020_1926_MOESM2_ESM.pdf]

## Additional file 2

### Supplementary figure 2

|   | 1 | 2                  | 3 | 4 | 1               | 2 | 3 | 4 | 1                    | 2 | 3 | 4 |  |
|---|---|--------------------|---|---|-----------------|---|---|---|----------------------|---|---|---|--|
| A |   | POS1               |   |   | POS2            |   |   |   | Amphiregulin         |   |   |   |  |
| B |   | Axl                |   |   | CD27 Ligand     |   |   |   | CD30 (TNFRSF8)       |   |   |   |  |
| C |   | CD40 (TNFRSF5)     |   |   | CXCL16          |   |   |   | EGF                  |   |   |   |  |
| D |   | E-Selectin         |   |   | Fractalkine     |   |   |   | GITR (TNFRSF18)      |   |   |   |  |
| E |   | HGF                |   |   | IGFBP-2         |   |   |   | IGFBP-3              |   |   |   |  |
| F |   | IGFBP-5            |   |   | IGFBP-6         |   |   |   | IGF-1                |   |   |   |  |
| G |   | IL-12 p70          |   |   | IL-17E (IL-25)  |   |   |   | IL-17F               |   |   |   |  |
| H |   | IL-1 ra (IL-1 F3)  |   |   | IL-2 R alpha    |   |   |   | IL-20                |   |   |   |  |
| I |   | IL-23 p19          |   |   | IL-28A          |   |   |   | I-TAC (CXCL11)       |   |   |   |  |
| J |   | MDC (CCL22)        |   |   | MIP-2           |   |   |   | MIP-3 alpha (CCL20)  |   |   |   |  |
| K |   | Osteopontin (SPP1) |   |   | Osteoprotegerin |   |   |   | Prolactin            |   |   |   |  |
| L |   | Pro-MMP-9          |   |   | P-Selectin      |   |   |   | Resistin             |   |   |   |  |
| M |   | SCF                |   |   | SDF-1 alpha     |   |   |   | Thrombopoietin (TPO) |   |   |   |  |
| N |   | VCAM-1 (CD106)     |   |   | VEGF-A          |   |   |   | VEGF-D               |   |   |   |  |

|   | 1 | 2                  | 3 | 4 | 1                   | 2 | 3 | 4 | 1                 | 2 | 3 | 4 |  |
|---|---|--------------------|---|---|---------------------|---|---|---|-------------------|---|---|---|--|
| A |   | POS1               |   |   | POS2                |   |   |   | bFGF              |   |   |   |  |
| B |   | BLC (CXCL13)       |   |   | CD30 Ligand         |   |   |   | Eotaxin-1 (CCL11) |   |   |   |  |
| C |   | Eotaxin-2 (MIPF-2) |   |   | Fas Ligand (TNFSF6) |   |   |   | GCSF              |   |   |   |  |
| D |   | GM-CSF             |   |   | ICAM-1 (CD54)       |   |   |   | IFN-gamma         |   |   |   |  |
| E |   | IL-1 alpha         |   |   | IL-1 beta           |   |   |   | IL-2              |   |   |   |  |
| F |   | IL-3               |   |   | IL-4                |   |   |   | IL-5              |   |   |   |  |
| G |   | IL-6               |   |   | IL-7                |   |   |   | IL-10             |   |   |   |  |
| H |   | IL-12 p40          |   |   | IL-13               |   |   |   | IL-15             |   |   |   |  |
| I |   | IL-17A             |   |   | IL-21               |   |   |   | KC (CXCL1)        |   |   |   |  |
| J |   | Leptin             |   |   | LIX                 |   |   |   | MCP-1 (CCL2)      |   |   |   |  |
| K |   | MCP-5              |   |   | M-CSF               |   |   |   | MIG (CXCL9)       |   |   |   |  |
| L |   | MIP-1 alpha (CCL3) |   |   | MIP-1 gamma         |   |   |   | Platelet Factor 4 |   |   |   |  |
| M |   | RANTES (CCL5)      |   |   | TARC (CCL17)        |   |   |   | I-309 (CCL1)      |   |   |   |  |
| N |   | TNF RI (TNFRSF1A)  |   |   | TNF RII (TNFRSF1B)  |   |   |   | TNF-alpha         |   |   |   |  |

|   | 1 | 2                    | 3 | 4 | 1                  | 2 | 3 | 4 | 1                      | 2 | 3 | 4 |  |
|---|---|----------------------|---|---|--------------------|---|---|---|------------------------|---|---|---|--|
| A |   | POS1                 |   |   | POS2               |   |   |   | 4-1BB (CD137)          |   |   |   |  |
| B |   | Ace                  |   |   | ALK-1              |   |   |   | Cardiotrophin-1 (CT-1) |   |   |   |  |
| C |   | CD27 (TNFRSF7)       |   |   | CD40 Ligand        |   |   |   | CTLA-4 (CD152)         |   |   |   |  |
| D |   | Decorin              |   |   | DKK-1              |   |   |   | Dkk                    |   |   |   |  |
| E |   | Endoglin (CD105)     |   |   | Fc-gamma-RIIB      |   |   |   | Fit-3 Ligand           |   |   |   |  |
| F |   | Galectin-1           |   |   | Galectin-3         |   |   |   | Gas 1                  |   |   |   |  |
| G |   | Gas 6                |   |   | GITR Ligand        |   |   |   | HAI-1                  |   |   |   |  |
| H |   | HGFR                 |   |   | IL-1 R4 (ST2)      |   |   |   | IL-3 R beta            |   |   |   |  |
| I |   | IL-9                 |   |   | JAM-A (CD321)      |   |   |   | Leptin R               |   |   |   |  |
| J |   | L-selectin (CD62L)   |   |   | Lymphotactin       |   |   |   | MadCAM-1               |   |   |   |  |
| K |   | MFG-E8               |   |   | MIP-3 beta (CCL19) |   |   |   | Nephrilysin            |   |   |   |  |
| L |   | Pentraxin-3 (TSG-14) |   |   | RAGE               |   |   |   | TAC1                   |   |   |   |  |
| M |   | TREM-1               |   |   | TROY               |   |   |   | TSLP                   |   |   |   |  |
| N |   | TWEAK R              |   |   | VEGF R1            |   |   |   | VEGF R3                |   |   |   |  |

|   | 1 | 2             | 3 | 4 | 1                  | 2 | 3 | 4 | 1                  | 2 | 3 | 4 |  |
|---|---|---------------|---|---|--------------------|---|---|---|--------------------|---|---|---|--|
| A |   | POS1          |   |   | POS2               |   |   |   | CD80 (B7-1)        |   |   |   |  |
| B |   | BAFF R        |   |   | Betacellulin (BTC) |   |   |   | C5a                |   |   |   |  |
| C |   | CCL6          |   |   | CD48 (SLAMF2)      |   |   |   | CD6                |   |   |   |  |
| D |   | Chemerin      |   |   | Clusterin          |   |   |   | CXCL15             |   |   |   |  |
| E |   | Cystatin C    |   |   | DAN                |   |   |   | DLL4               |   |   |   |  |
| F |   | EDAR          |   |   | Endocan            |   |   |   | Fetuin A           |   |   |   |  |
| G |   | H60           |   |   | IL-33              |   |   |   | IL-7 R alpha       |   |   |   |  |
| H |   | Kremen-1      |   |   | Limitin            |   |   |   | Lipocalin-2 (NGAL) |   |   |   |  |
| I |   | LOX-1         |   |   | Marapsin           |   |   |   | MBL-2              |   |   |   |  |
| J |   | Meteorin      |   |   | Nope               |   |   |   | NOV (CCN3)         |   |   |   |  |
| K |   | Osteoactivin  |   |   | OX40 Ligand        |   |   |   | P-Cadherin         |   |   |   |  |
| L |   | Periostin     |   |   | PIGF-2             |   |   |   | Progranulin        |   |   |   |  |
| M |   | Prostasin     |   |   | Renin 1            |   |   |   | Testican 3         |   |   |   |  |
| N |   | TIM-1 (KIM-1) |   |   | TRAIL (TNFSF10)    |   |   |   | Tryptase epsilon   |   |   |   |  |

|   | 1 | 2          | 3 | 4 | 1          | 2 | 3 | 4 | 1           | 2 | 3 | 4 |  |
|---|---|------------|---|---|------------|---|---|---|-------------|---|---|---|--|
| A |   | POS1       |   |   | POS2       |   |   |   | 6Ckine      |   |   |   |  |
| B |   | Activin A  |   |   | ADAMTS1    |   |   |   | Adiponectin |   |   |   |  |
| C |   | ANG-3      |   |   | ANGPTL3    |   |   |   | Artemin     |   |   |   |  |
| D |   | CCL28      |   |   | CD36       |   |   |   | Chordin     |   |   |   |  |
| E |   | CRP        |   |   | E-Cadherin |   |   |   | Epigen      |   |   |   |  |
| F |   | Epiregulin |   |   | Fas        |   |   |   | Galectin-7  |   |   |   |  |
| G |   | gp130      |   |   | Granzyme B |   |   |   | Gremlin     |   |   |   |  |
| H |   | IFN-γ R1   |   |   | IL-17B     |   |   |   | IL-17B R    |   |   |   |  |
| I |   | IL-22      |   |   | MIP-1β     |   |   |   | MMP-2       |   |   |   |  |
| J |   | MMP-3      |   |   | MMP-10     |   |   |   | PDGF-AA     |   |   |   |  |
| K |   | Persephin  |   |   | sFRP-3     |   |   |   | Shh-N       |   |   |   |  |
| L |   | SLAM       |   |   | TCK-1      |   |   |   | TECK        |   |   |   |  |
| M |   | TGFβ1      |   |   | TRANCE     |   |   |   | TremL1      |   |   |   |  |
| N |   | TWEAK      |   |   | VEGF-B     |   |   |   | VEGF-R2     |   |   |   |  |

Figure S2. Two hundred mouse cytokines detected by antibody microarrays.
