# Supplementary material
Source: PubMed Central journal article supplement (PMC7656718)
Supplement: 13287_2020_1926_MOESM3_ESM.pdf [file 13287_2020_1926_MOESM3_ESM.pdf]

## Additional file 3

### Supplementary figure 3

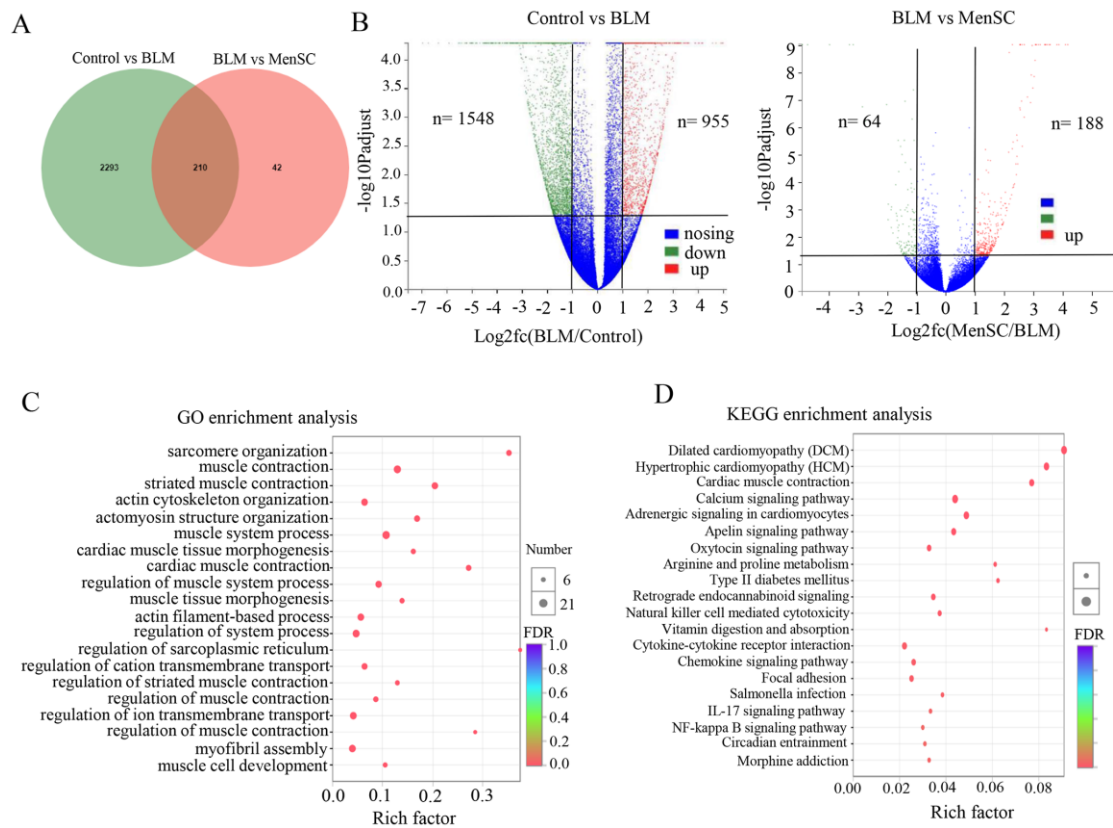

**Figure S3. RNA-sequence of lung tissues in three different groups.** **A** Venn analysis between two different groups ( $n=5$ ). **B** A volcano plot showed different gene. Red, green, blue color represents upregulated, downregulated, and unchanged expression, respectively. **(C, D)**: Top 20 significantly different results from GO **(C)** and KEGG pathway **(D)** analyses.
