# Supplementary material
Source: PubMed Central journal article supplement (PMC7656718)
Supplement: 13287_2020_1926_MOESM4_ESM.pdf [file 13287_2020_1926_MOESM4_ESM.pdf]

Additional file 4

Supplementary figure 4

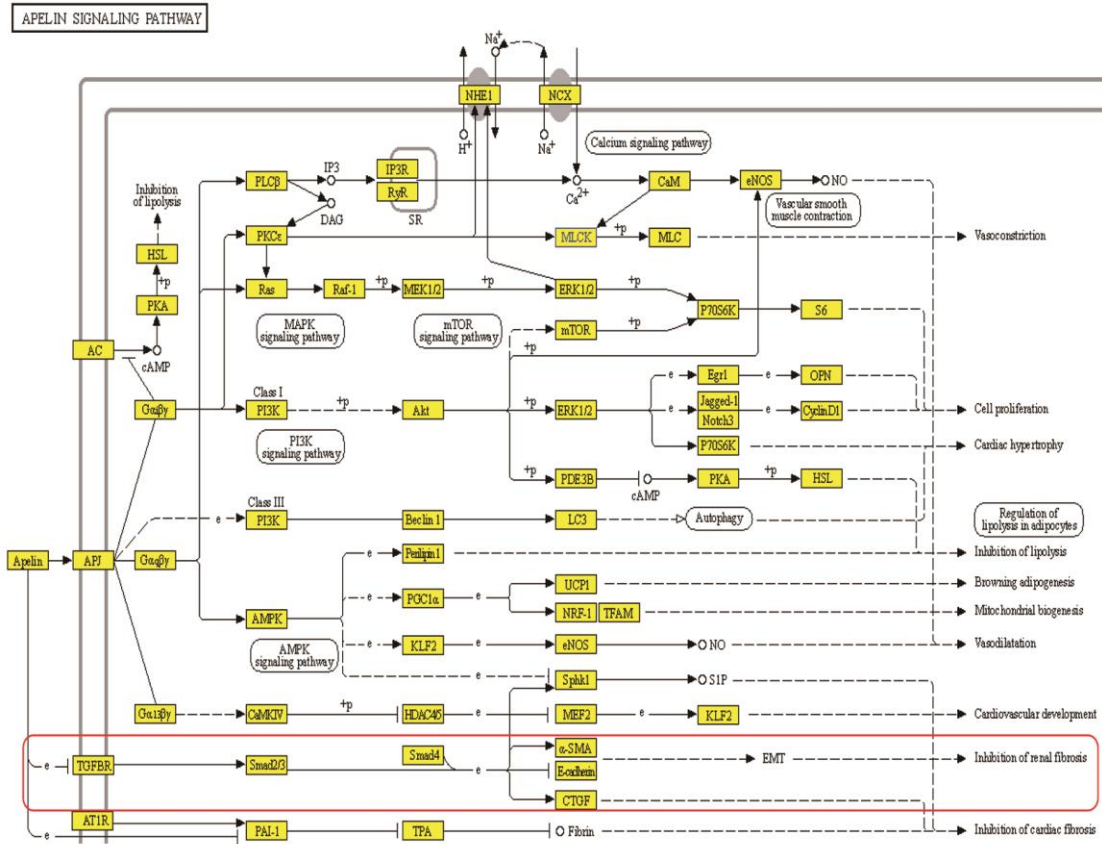

**Figure S4. Bioinformatics analysis of the Apelin signaling pathway: expression of  $\alpha$ -SMA, CTGF and E-cadherin related to renal fibrosis.**
