# Supplementary material
Source: PubMed Central journal article supplement (PMC7656718)
Supplement: 13287_2020_1926_MOESM5_ESM.pdf [file 13287_2020_1926_MOESM5_ESM.pdf]

Additional file 5

Supplemental table 1

**Table S1. Anti-body list Related to figure 1. 4. 7 and figure S1.**

| Anti-body Name             | Manufacturer   | Cat.<br>Num. | Application | Dilution<br>ratio/Dosage |
|----------------------------|----------------|--------------|-------------|--------------------------|
| PE-mouse anti-human CD29   | BD Biosciences | 561795       | Flow Cyt    | 10µl                     |
| PE-mouse anti-human CD34   | BD Biosciences | 560941       | Flow Cyt    | 10µl                     |
| PE-mouse anti-human CD45   | BD Biosciences | 560975       | Flow Cyt    | 10µl                     |
| PE-mouse anti-human CD73   | BD Biosciences | 561014       | Flow Cyt    | 10µl                     |
| PE-mouse anti-human CD90   | BD Biosciences | 561970       | Flow Cyt    | 2.5µl                    |
| PE-mouse anti-human CD105  | BD Biosciences | 560839       | Flow Cyt    | 2.5µl                    |
| PE-mouse117 anti-human CD  | BD Biosciences | 561682       | Flow Cyt    | 2.5µl                    |
| PE-mouse anti-human HLA-DR | BD Biosciences | 560943       | Flow Cyt    | 10µl                     |
| PE mouse IgG1              | BD Biosciences | 555749       | Flow Cyt    | 10µl                     |
| PE mouse IgG2a             | BD Biosciences | 555574       | Flow Cyt    | 10µl                     |
| TGF-β1                     | Abcam          | ab92486      | WB/IHC-P    | 1:1000/1:100             |

|                  |                |          |          |                                  |
|------------------|----------------|----------|----------|----------------------------------|
| a-SMA            | Abcam          | ab5694   | WB/IHC-P | 1:500/1:100                      |
| CTGF             | Abcam          | ab6992   | WB/IHC-P | 1:1000/1:200                     |
| E-cadherin       | Abcam          | ab76055  | WB/IHC-P | 1:1000/1:100                     |
| Fibronectin      | Abcam          | ab2413   | WB/IHC-P | 1:1000/1:100                     |
| Pro-SPC          | Abcam          | ab90716  | IHC-P    | 1:100                            |
| P-Smad3          | Abcam          | ab52903  | WB       | 1:2000                           |
| Smad3            | Abcam          | ab20818  | WB       | 1:1000                           |
| Bcl2             | Cell Signaling | 2876S    | WB       | 1:1000                           |
| BAX              | Cell Signaling | 2772     | WB       | 1:1000                           |
| Cleaved caspase3 | Cell Signaling | 9664     | WB       | 1:1000                           |
| GAPDH            | Abcam          | ab8245   | WB       | 1:5000                           |
| $\beta$ -actin   | Abcam          | ab8226   | WB       | 1:5000                           |
| SPD              | Santa cruz     | Sc-13979 | IF/ICC   | 1:100                            |
| N-cadherin       | Abcam          | ab18203  | ICC      | 1:50                             |
| Collagen1        | Abcam          | Ab26004  | ICC      | 1:250                            |
| APC/CY7-CD45     | BD Bioscience  | 557659   | Flow Cyt | 5 $\mu$ g/10 <sup>6</sup> cell   |
| APC/CY7-CD31     | Biolegend      | 102439   | Flow Cyt | 0.5 $\mu$ g/10 <sup>6</sup> cell |

---

|                                               |                         |         |              |                                   |
|-----------------------------------------------|-------------------------|---------|--------------|-----------------------------------|
| BV711-CD326                                   | BD                      | 563134  | Flow Cyt     | 5 $\mu$ g/10 <sup>6</sup> ce      |
|                                               | Bioscience              |         |              | ll                                |
| CD16/32                                       | BD                      | 553142  | Flow Cyt     | 1 $\mu$ g/10 <sup>6</sup> ce      |
|                                               | Bioscience              |         |              | ll                                |
| FVS700                                        | BD                      | 564997  | Flow Cyt     | 0.32 $\mu$ g/10 <sup>6</sup> cell |
|                                               | Bioscience              |         |              |                                   |
| Alexa<br>conjugated<br>mouse                  | Fluo-488-<br>goat anti- | Abcam   | ab15011<br>7 | ICC<br>1:500                      |
| Alexa Fluo-633-conjugated<br>goat anti-rabbit | Invitrogen              | A-21071 | ICC          | 1:500                             |

---
