# Supplementary material
Source: PubMed Central journal article supplement (PMC7656718)
Supplement: 13287_2020_1926_MOESM6_ESM.pdf [file 13287_2020_1926_MOESM6_ESM.pdf]

Additional file 6

Supplemental table 2

**Table S2. Primer list related to Figure 3.**

| Gene name     | Primer name                            | Species |
|---------------|----------------------------------------|---------|
| $\alpha$ -SMA | $\alpha$ -SMA-F: AAGAGGAAGACAGCACAGCTC | Mouse   |
|               | $\alpha$ -SMA-R: GATGGATGGGAAAACAGCC   |         |
| Fibronectin   | fibronectin-F: CTCAGCTTCCGACACCGT,     | Mouse   |
|               | fibronectin-R: CAGGCGCTGTTGTTTGTG      |         |
| Collagen1     | Collagen1-F: GCTCCTCTTAGGGGCCACT,      | Mouse   |
|               | Collagen1-R: CCACGTCTCACCATTGGGG       |         |
| GAPDH         | GAPDH-F: AGGTCGGTGTGAACGGATTTG         | Mouse   |
|               | GAPDH-R: TGTAGACCATGTAGTTGAGGTCA       |         |
